# Supplementary material for: Cost-Effectiveness of Facilitated Access to a Self-Management Website, Compared to Usual Care, for Patients With Type 2 Diabetes (HeLP-Diabetes): Randomized Controlled Trial
Source: PubMed Central journal article supplement (PMC6015272; doi:10.2196/jmir.9256), 2018-06-08
Supplement: jmir_v20i6e201_app3.pdf [file jmir_v20i6e201_app3.pdf]

The health resource use data collected at baseline, three months and twelve months follow-ups, covered the time periods of 12 months before baseline, months 1-3 of the trial and months 4-12 of the trial. Limited by the lost-to-follow-up, the mean usage at the two follow-up points couldn't be combined and compared directly. However, the large standard deviations indicated that the use of health services was not even among participants. Rather, a small group of participants appeared to be use a very high volume of services. Details were presented in Supplemental Table 1.

Supplemental Table 1 Frequency of health care and social services use at each time point, by group

| Service item                             | 12 months prior to baseline |                | Months 1-3     |                | Months 4-12              |                          |
|------------------------------------------|-----------------------------|----------------|----------------|----------------|--------------------------|--------------------------|
|                                          | Intervention                | Control        | Intervention   | Control        | Intervention             | Control                  |
|                                          | Mean (S.D.)                 | Mean (S.D.)    | Mean (S.D.)    | Mean (S.D.)    | Mean (S.D.)              | Mean (S.D.)              |
| <b>Services use recorded by nurses</b>   | <b>n = 185</b>              | <b>n = 189</b> | <b>n = 153</b> | <b>n = 165</b> | <b>n = 151</b>           | <b>n = 155</b>           |
| GP consultation (in surgery)             | 4.65 (4.60)                 | 5.22 (4.54)    | 1.39 (1.74)    | 1.71 (1.99)    | 2.68 (2.78)              | 3.10 (2.97)              |
| GP consultation (home visit)             | 0.02 (0.18)                 | 0.05 (0.47)    | 0              | 0.02 (0.13)    | 0.01 (0.08)              | 0.07 (0.52)              |
| GP consultation (telephone)              | 1.01 (1.78)                 | 1.76 (3.31)    | 0.42 (0.89)    | 0.57 (1.05)    | 0.91 (1.51)              | 1.30 (2.14)              |
| Practice nurse consultation (in surgery) | 3.57 (4.51)                 | 3.43 (4.82)    | 1.38 (1.53)    | 1.40 (1.96)    | 2.50 (3.14)              | 2.61 (3.99)              |
| Practice nurse consultation (home visit) | 0.02 (0.23)                 | 0.10 (1.38)    | 0.18 (1.95)    | 0.01 (0.08)    | 0                        | 0.03 (0.16)              |
| Walk-in centre                           | 0.04 (0.28)                 | 0.06 (0.30)    | 0.03 (0.26)    | 0.02 (0.15)    | 0.08 (0.67)              | 0.10 (0.32)              |
| Out of Hour service (telephone)          | 0.03 (0.19)                 | 0.06 (0.32)    | 0.02 (0.18)    | 0.02 (0.13)    | 0.03 (0.18)              | 0.08 (0.34)              |
| Out of Hour service (home visit)         | 0.02 (0.16)                 | 0.02 (0.18)    | 0              | 0              | 0                        | 0.01 (0.16)              |
| Out of Hour service (clinics)            | 0.06 (0.32)                 | 0.09 (0.35)    | 0.03 (0.02)    | 0.02 (0.15)    | 0.12 (0.65)              | 0.08 (0.41)              |
| Clinical test                            | 15.59 (28.95) <sup>a</sup>  | 17.30 (32.13)  | 3.62 (4.66)    | 3.27 (3.36)    | 7.42 (5.14)              | 7.17 (4.80) <sup>a</sup> |
| A & E admission                          | 0.15 (0.45)                 | 0.26 (0.68)    | 0.07 (0.31)    | 0.05 (0.25)    | 0.10 (0.36)              | 0.15 (0.47)              |
| Outpatient attendance                    | 2.15 (2.89)                 | 2.88 (4.16)    | 0.81 (1.33)    | 0.79 (1.21)    | 1.33 (2.64)              | 1.54 (2.10)              |
| Day case                                 | 0.16 (0.47)                 | 0.15 (0.46)    | 0.03 (0.16)    | 0.05 (0.22)    | 0.13 (0.47)              | 0.12 (0.38)              |
| Inpatient admission                      | 0.14 (0.47)                 | 0.17 (0.72)    | 0.05 (0.25)    | 0.01 (0.11)    | 0.06 (0.26)              | 0.10 (0.33)              |
| Podiatrist attendance                    | 0.37 (1.19)                 | 0.35 (1.19)    | 0.10 (0.39)    | 0.10 (0.34)    | 0.30 (0.96)              | 0.18 (0.83) <sup>a</sup> |
| Eye screening <sup>b</sup>               | 0.91 (0.43)                 | 0.96 (0.42)    | 0.34 (0.48)    | 0.32 (0.46)    | 0.58 (0.51)              | 0.65 (0.48)              |
| Physiotherapy                            | 0.32 (1.29)                 | 0.27 (1.08)    | 0.15 (0.62)    | 0.16 (0.84)    | 0.21 (1.06) <sup>a</sup> | 0.36 (1.38) <sup>a</sup> |
| Counselling                              | 0.18 (1.14)                 | 0.08 (0.70)    | 0.03 (0.27)    | 0.02 (0.17)    | 0.09 (0.57)              | 0.01 (0.11) <sup>a</sup> |

| service                                      |                |                |                          |                          |                |                          |
|----------------------------------------------|----------------|----------------|--------------------------|--------------------------|----------------|--------------------------|
| <b>Services use reported by participants</b> | <b>n = 185</b> | <b>n = 189</b> | <b>n = 143</b>           | <b>n = 152</b>           | <b>n = 129</b> | <b>n = 135</b>           |
| District nurse consultation (home visit)     | 0.11 (0.96)    | 0.19 (1.55)    | 0                        | 0.01 (0.08)              | 0              | 0.01 (0.09)              |
| District nurse consultation (clinic)         | 0.58 (1.16)    | 0.75 (2.07)    | 0.29 (0.61)              | 0.36 (0.77)              | 0.45 (0.85)    | 1.07 (4.35)              |
| NHS Direct                                   | 0.20 (0.84)    | 0.28 (0.93)    | 0.06 (0.32)              | 0.10 (0.55) <sup>c</sup> | 0.12 (0.50)    | 0.10 (0.39)              |
| Counselling service                          | 0.12 (0.73)    | 0.29 (1.49)    | 0.05 (0.32) <sup>a</sup> | 0.08 (0.42)              | 0.13 (0.76)    | 0.19 (0.99)              |
| Social worker                                | 0.01 (0.07)    | 0.06 (0.53)    | 0                        | 0                        | 0.02 (0.18)    | 0                        |
| Occupational therapy                         | 0.24 (2.06)    | 0.11 (0.65)    | 0.01 (0.08)              | 0.05 (0.50)              | 0.05 (0.33)    | 0.07 (0.38) <sup>d</sup> |
| Dietician attendance                         | 0.21 (0.77)    | 0.41 (1.87)    | 0.05 (0.25)              | 0.14 (1.25)              | 0.15 (0.78)    | 0.12 (0.49)              |

<sup>a</sup> One person had missing data on this item

<sup>b</sup> The majority of the eye screening was undertaken by a community retinal screening service, with 10.5% taken in an optician and 30.4% in hospital in the intervention group and 10.4% in an optician and 28.6% in hospital in the control group.

<sup>c</sup> Two people had missing data on this question

<sup>d</sup> One person had missing data on all other questions except for this one
